# Supplementary material for: Poly(3,4-ethylenedioxythiophene) encapsulating hydrated vanadium oxide nanobelts boosts their conductivity and zinc-ion storage properties
Source: Royal Society of Chemistry journal article supplement (doi:10.1039/d3qi00781b), 2023-01-01
Supplement: d3qi00781b1.pdf [file d3qi00781b1.pdf]

### Supporting Information

#### **Poly(3,4-ethylenedioxythiophene) Encapsulating Hydrated Vanadium Oxide Nanobelts Boosts their Conductivity and Zinc-ion Storage Properties**

Jingjing Sun<sup>1</sup>, Mengyu Rong<sup>1</sup>, Zhanming Gao<sup>2</sup>, Ziyi Feng<sup>1</sup>, Yanyan Liu<sup>1</sup>, Tao Hu<sup>1,\*</sup>, Changgong Meng<sup>1,3</sup>,  
Yifu Zhang<sup>1,\*</sup>

*<sup>1</sup>School of Chemistry, Dalian University of Technology, Dalian, 116024, China*

*<sup>2</sup>State Key Laboratory of Fine Chemicals, School of Chemical Engineering, Dalian University of Technology, Dalian, 116024, China*

*<sup>3</sup>College of Environmental and Chemical Engineering, Dalian University, Dalian, 116622, China*

\*Corresponding authors.

Tao Hu: inorchem@dlut.edu.cn; Yifu Zhang: yfzhang@dlut.edu.cn

## **Materials**

Ammonium metavanadate ( $\text{NH}_4\text{VO}_3$ , 99%) and glacial acetic acid (HOAc, 99.5%) were purchased from the Siopharm Chemical Reagent Co., Ltd. 3,4-ethylenedioxythiophene (EDOT) monomer was purchased from the Tianjin Damao Chemical Reagent Factory. All materials were used as received without any further treatment.

**Fig. S1**

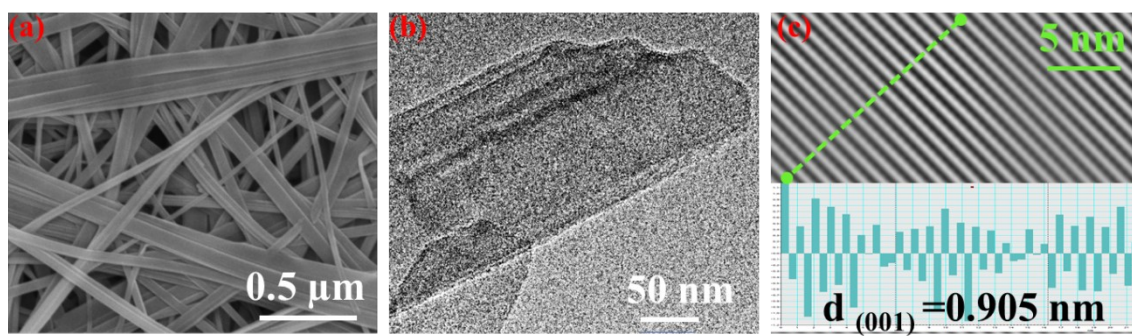

**Fig. S1.** Morphology of VOH: **a** SEM image; **b** TEM image; **c** HRTEM image and corresponding lattice distance.

Fig. S2

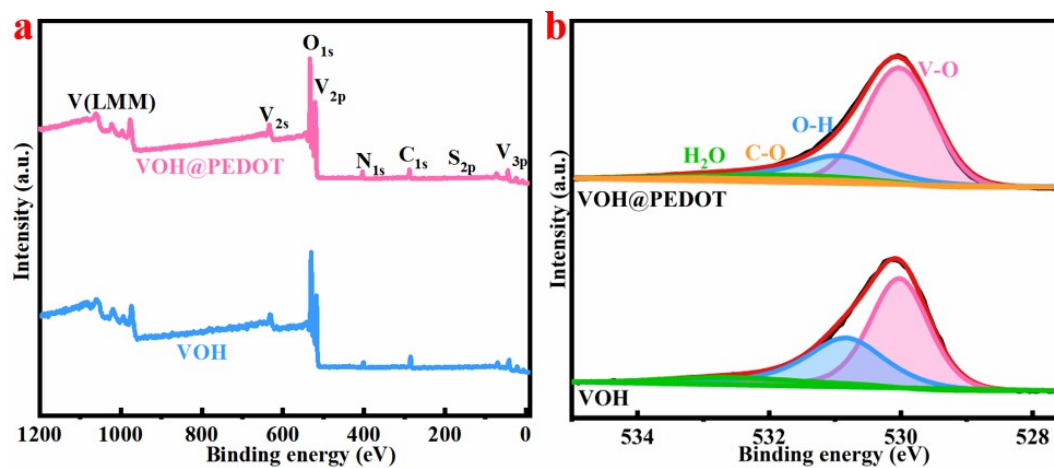

Fig. S2. a XPS survey spectra and b high-resolution O 2p XPS spectra of VOH and VOH@PEDOT.

Fig. S3

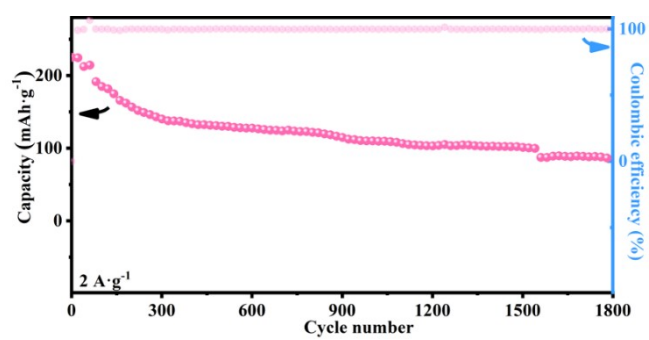

Fig. S3. Cycling performance of Zn//VOH@PEDOT cell at 0.1 A g<sup>-1</sup>

Fig. S4

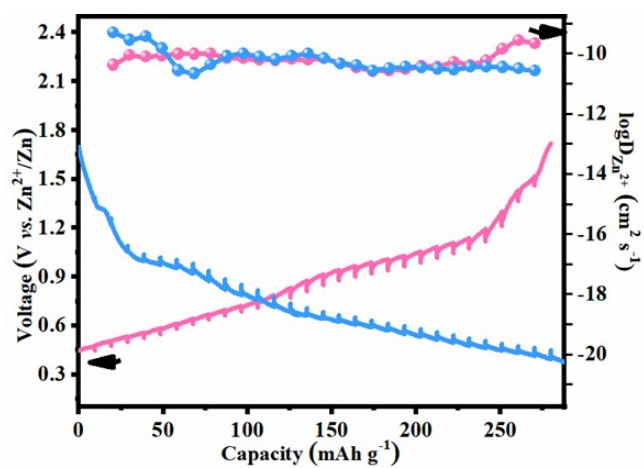

Fig. S4. GITT curves and the diffusion coefficients of the Zn//VOH cell at charge/discharge states.

Fig. S5

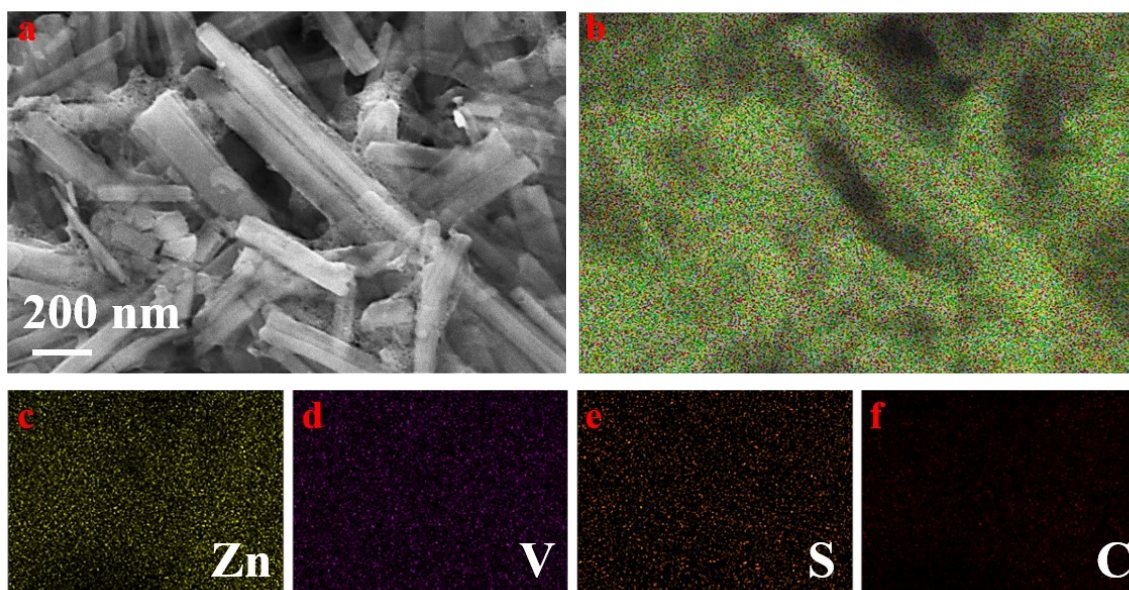

Fig. S5. a SEM image of VOH@PEDOT after long cycles. b-f Elemental mapping images of VOH@PEDOT.

Fig. S6

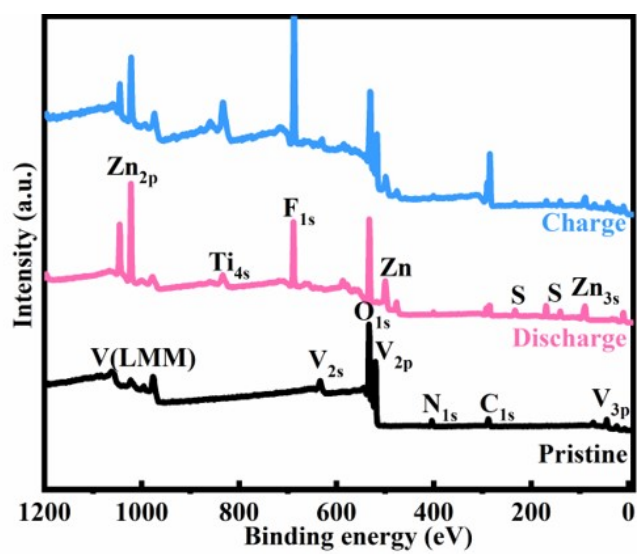

Fig. S6. XPS survey spectra of VOH@PEDOT at different states.



Fig. S7

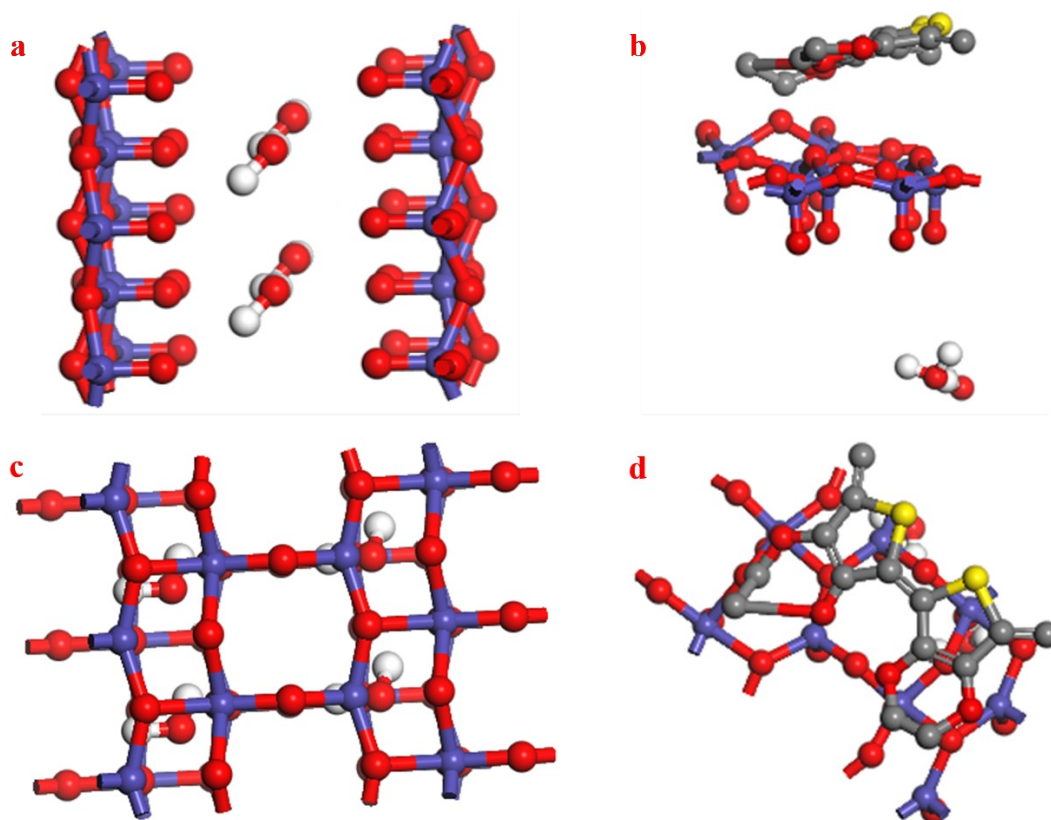

Fig. S7. Structural side and top views of VOH (a and c) and VOH@PEDOT (b and d).

Fig. S8

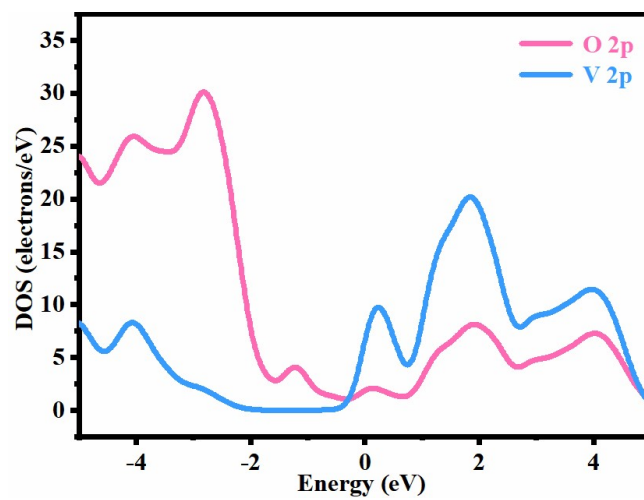

Fig. S8. DOS of O 2p and C 2p orbitals for VOH@PEDOT.

**Table S1**

**Table S1.** Detailed information on the peak position and intensity of high-resolution V 2p spectra of VOH and VOH@PEDOT in various states.

| <b>Material</b>           | <b>Information</b> | <b>V<sup>5+</sup> (2p<sub>1/2</sub>)</b> | <b>V<sup>4+</sup> (2p<sub>1/2</sub>)</b> | <b>V<sup>3+</sup> (2p<sub>1/2</sub>)</b> | <b>V<sup>5+</sup> (2p<sub>3/2</sub>)</b> | <b>V<sup>4+</sup> (2p<sub>3/2</sub>)</b> | <b>V<sup>3+</sup> (2p<sub>3/2</sub>)</b> |
|---------------------------|--------------------|------------------------------------------|------------------------------------------|------------------------------------------|------------------------------------------|------------------------------------------|------------------------------------------|
| VOH                       | Position (eV)      | 525.2                                    | 524.5                                    | 523.8                                    | 517.8                                    | 517.4                                    | 516.1                                    |
|                           | Area               | 5856.55                                  | 1213.77                                  | 7110.5                                   | 11538.3                                  | 11867.4                                  | 9881.2                                   |
|                           | Proportion (%)     | 12                                       | 2.6                                      | 15                                       | 24.3                                     | 25                                       | 21                                       |
| VOH@PEDOT<br>(pristine)   | Position (eV)      | 525.2                                    | 524.5                                    | 523.8                                    | 517.8                                    | 517.3                                    | 516.1                                    |
|                           | Area               | 8740                                     | 5374.2                                   | 17751                                    | 23416.8                                  | 29538.6                                  | 19693.4                                  |
|                           | Proportion (%)     | 8.4                                      | 5                                        | 1.7                                      | 22.4                                     | 28.3                                     | 18.8                                     |
| VOH@PEDOT<br>(discharged) | Position (eV)      | 525.2                                    | 524.5                                    | 523.8                                    | 517.8                                    | 516.9                                    | 516.1                                    |
|                           | Area               | 474.3                                    | 932.6                                    | 3700                                     | 2038.4                                   | 1349.2                                   | 1555                                     |
|                           | Proportion (%)     | 4.7                                      | 9.3                                      | 37                                       | 20.3                                     | 13.4                                     | 15.5                                     |
| VOH@PEDOT<br>(charged)    | Position (eV)      | 525.2                                    | 524.5                                    | 523.8                                    | 517.8                                    | 517.3                                    | 516.3                                    |
|                           | Area               | 5018.2                                   | 827                                      | 6908.3                                   | 11468.5                                  | 13837.4                                  | 2440                                     |
|                           | Proportion (%)     | 12                                       | 2                                        | 17                                       | 28                                       | 34.2                                     | 6                                        |

**Table S2**

**Table S2.** Comparison of the electrochemical performance of other aqueous zinc-ion batteries with similar cathode materials with the Zn//VOH@PEDOT cell

| Cathode materials                                              | Specific capacity                                                       | Cycling                                                                | Energy density            | Power density            | Ref. |
|----------------------------------------------------------------|-------------------------------------------------------------------------|------------------------------------------------------------------------|---------------------------|--------------------------|------|
| VO <sub>2</sub> (B) nanofibers                                 | 357 mAh g <sup>-1</sup> at 0.1 A g <sup>-1</sup>                        | ~100% after 50 cycles at 0.1 A g <sup>-1</sup>                         | 297 Wh kg <sup>-1</sup>   | 180 W kg <sup>-1</sup>   | 1    |
| VO <sub>2</sub> /rGO composite                                 | 276 mAh g <sup>-1</sup> at 0.1 A g <sup>-1</sup>                        | 99% after 1000 cycles at 4 A g <sup>-1</sup>                           | 65 Wh kg <sup>-1</sup>    | 7800 W kg <sup>-1</sup>  | 2    |
| H <sub>2</sub> V <sub>3</sub> O <sub>8</sub> nanowire/Graphene | 394 mAh g <sup>-1</sup> at 0.1 A g <sup>-1</sup>                        | -                                                                      | 89 Wh kg <sup>-1</sup>    | 2215 W kg <sup>-1</sup>  | 3    |
| V <sub>10</sub> O <sub>24</sub> ·12H <sub>2</sub> O            | 164.5 mAh g <sup>-1</sup> at 0.2 A g <sup>-1</sup> after 2 cycles       | 81.6% after 1000 cycles at 5 A g <sup>-1</sup>                         | 163.4 Wh kg <sup>-1</sup> | 217.9 W kg <sup>-1</sup> | 4    |
| V <sub>2</sub> O <sub>5</sub> ·nH <sub>2</sub> O/graphene      | 381 mAh g <sup>-1</sup> at 0.3 A g <sup>-1</sup>                        | 71% after 900 cycles at 6 A g <sup>-1</sup>                            | 90 Wh kg <sup>-1</sup>    | 6400 W kg <sup>-1</sup>  | 5    |
| CaVOH/rGO                                                      | 409 mAh g <sup>-1</sup> at 0.05 A g <sup>-1</sup>                       | 90% over 2000 cycles at 4 A g <sup>-1</sup>                            | 381 Wh kg <sup>-1</sup>   | 48 W kg <sup>-1</sup>    | 6    |
| PANI-V <sub>2</sub> O <sub>5</sub> ·nH <sub>2</sub> O          | 363 and 143 mAh g <sup>-1</sup> at 0.1 and 4 A g <sup>-1</sup>          | 196 mAh g <sup>-1</sup> left over 100 cycles at 5 A g <sup>-1</sup>    | 275 Wh kg <sup>-1</sup>   | 78 W kg <sup>-1</sup>    | 7    |
| PANI-V <sub>2</sub> O <sub>5</sub> ·nH <sub>2</sub> O          | 350 mAh g <sup>-1</sup> at 0.1 A g <sup>-1</sup>                        | -                                                                      | -                         | -                        | 8    |
| PANI-V <sub>2</sub> O <sub>5</sub> ·nH <sub>2</sub> O          | 380 mAh g <sup>-1</sup> at 0.1 A g <sup>-1</sup>                        | 259 mAh g <sup>-1</sup> left over 800 cycles at 1 A g <sup>-1</sup>    | 216 Wh kg <sup>-1</sup>   | 252 W kg <sup>-1</sup>   | 9    |
| PANI/V <sub>2</sub> O <sub>5</sub>                             | 353.6 mAh g <sup>-1</sup> at 0.1 A g <sup>-1</sup>                      | 280 mAh g <sup>-1</sup> left over 100 cycles at 0.2 A g <sup>-1</sup>  | 258 Wh kg <sup>-1</sup>   | 2784 W kg <sup>-1</sup>  | 10   |
| PANI-V <sub>2</sub> O <sub>5</sub>                             | 360 mAh g <sup>-1</sup> at 0.5 A g <sup>-1</sup>                        | 208 mAh g <sup>-1</sup> left over 2000 cycles at 5 A g <sup>-1</sup>   | 187 Wh kg <sup>-1</sup>   | 7200 W kg <sup>-1</sup>  | 11   |
| Rose-like PANI-intercalated V <sub>2</sub> O <sub>5</sub>      | 420 mAh g <sup>-1</sup> at 0.5 A g <sup>-1</sup>                        | 87.5% left over 600 cycles at 5 A g <sup>-1</sup>                      | -                         | -                        |      |
| PANI-intercalated V <sub>2</sub> O <sub>5</sub>                | 490 mAh g <sup>-1</sup> at 0.1 A g <sup>-1</sup>                        | 201 mAh g <sup>-1</sup> left over 1000 cycles at 2 C                   | 430 Wh kg <sup>-1</sup>   | -                        | 11   |
| V <sub>2</sub> O <sub>5</sub> /PEDOT                           | 380, 274 and 102 mAh g <sup>-1</sup> at 0.3, 5 and 20 A g <sup>-1</sup> | 93% capacity left over 200 cycles at 5 A g <sup>-1</sup>               | -                         | -                        | 12   |
| PANI-VOH@PANI                                                  |                                                                         |                                                                        | 576.8 Wh kg <sup>-1</sup> | 84.1 W kg <sup>-1</sup>  | 13   |
| PEDOT intercalated VOH                                         | 370.5 and 175 mAh g <sup>-1</sup> at 0.5 and 50 A g <sup>-1</sup>       | 310.1 mAh g <sup>-1</sup> left over 1000 cycles at 5 A g <sup>-1</sup> | -                         | -                        | 14   |
| PEDOT intercalated Vö- V <sub>2</sub> O <sub>5</sub>           | 449 mAh g <sup>-1</sup> at 0.2 A g <sup>-1</sup>                        | 94.3% capacity left over 6000                                          | 302 Wh kg <sup>-1</sup>   | 60 W kg <sup>-1</sup>    | 15   |

|                                                      |                                                                       |                                                                                                                       |                            |                          |           |
|------------------------------------------------------|-----------------------------------------------------------------------|-----------------------------------------------------------------------------------------------------------------------|----------------------------|--------------------------|-----------|
|                                                      |                                                                       | cycles at 10 A g <sup>-1</sup>                                                                                        |                            |                          |           |
| PEDOT intercalated<br>V <sub>2</sub> O <sub>5</sub>  | 388, 367 and 351 mAh g <sup>-1</sup> at 5, 8 and 10 A g <sup>-1</sup> | 269 mAh g <sup>-1</sup> left over 4500 cycles at 10 A g <sup>-1</sup>                                                 | 247.57 Wh kg <sup>-1</sup> | 590.8 W kg <sup>-1</sup> | 16        |
| PEDOT-NH <sub>4</sub> V <sub>3</sub> O <sub>8</sub>  | 356.8 and 163.6 mAh g <sup>-1</sup> at 0.05 and 10 A g <sup>-1</sup>  | 94.1% capacity left over 5000 cycles at 10 A g <sup>-1</sup>                                                          | 353.1 Wh kg <sup>-1</sup>  | 50 W kg <sup>-1</sup>    | 17        |
| V <sub>2</sub> O <sub>5</sub> @PEDOT on carbon cloth | 360 and 232 mAh g <sup>-1</sup> at 0.1 and 20 A g <sup>-1</sup>       | 97% capacity left over 600 cycles at 1 A g <sup>-1</sup><br>89% capacity left over 1000 cycles at 5 A g <sup>-1</sup> | 243.3 Wh kg <sup>-1</sup>  | 90 W kg <sup>-1</sup>    | 18        |
| VOH@PEDOT                                            | 432 mAh g <sup>-1</sup> at 0.1 A g <sup>-1</sup>                      | 323 mAh g <sup>-1</sup> left over 100 cycles at 0.1 A g <sup>-1</sup>                                                 | 255 Wh kg <sup>-1</sup>    | 245 W kg <sup>-1</sup>   | This work |

**Table S3**

**Table S3.** Detailed information on the peak position and intensity of high-resolution C 1s spectra of VOH@PEDOT in various states.

| <b>State</b> | <b>Information</b> | <b>C-O</b> | <b>C-S</b> | <b>C=C</b> | <b>C-C</b> |
|--------------|--------------------|------------|------------|------------|------------|
| Pristine     | Position (eV)      | 288.24     | 286.06     | 284.77     | 284.1      |
|              | Area               | 1191.3     | 4467.5     | 4488.2     | 1465.3     |
|              | Proportion (%)     | 10.3       | 38.6       | 38.75      | 12.4       |
| Discharged   | Position (eV)      | 288.24     | 286.4      | 284.77     | 284.1      |
|              | Area               | 4045.2     | 13339.8    | 12251      | 6760.2     |
|              | Proportion (%)     | 11.1       | 36.7       | 33.7       | 17.2       |
| Charged      | Position (eV)      | 288.24     | 286.06     | 284.77     | 284.1      |
|              | Area               | 1403.2     | 13046.4    | 11765.8    | 913.6      |
|              | Proportion (%)     | 5.2        | 49.1       | 44.1       | 3.4        |

## References

1. J. Ding, Z. Du, L. Gu, B. Li, L. Wang, S. Wang, Y. Gong and S. Yang, Ultrafast Zn<sup>2+</sup> Intercalation and Deintercalation in Vanadium Dioxide, *Adv. Mater.*, 2018, **30**, 1800762.
2. X. Dai, F. Wan, L. Zhang, H. Cao and Z. Niu, Freestanding graphene/VO<sub>2</sub> composite films for highly stable aqueous Zn-ion batteries with superior rate performance, *Energy Storage Mater.*, 2019, **17**, 143-150.
3. Q. Pang, C. Sun, Y. Yu, K. Zhao, Z. Zhang, P. M. Voyles, G. Chen, Y. Wei and X. Wang, H<sub>2</sub>V<sub>3</sub>O<sub>8</sub> Nanowire/Graphene Electrodes for Aqueous Rechargeable Zinc Ion Batteries with High Rate Capability and Large Capacity, *Adv. Energy Mater.*, 2018, **8**, 1800144.
4. T. Wei, Q. Li, G. Yang and C. Wang, High-rate and durable aqueous zinc ion battery using dendritic V<sub>10</sub>O<sub>24</sub>·12H<sub>2</sub>O cathode material with large interlamellar spacing, *Electrochim. Acta*, 2018, **287**, 60-67.
5. M. Yan, P. He, Y. Chen, S. Wang, Q. Wei, K. Zhao, X. Xu, Q. An, Y. Shuang, Y. Shao, K. T. Mueller, L. Mai, J. Liu and J. Yang, Water-Lubricated Intercalation in V<sub>2</sub>O<sub>5</sub>·nH<sub>2</sub>O for High-Capacity and High-Rate Aqueous Rechargeable Zinc Batteries, *Adv. Mater.*, 2018, **30**, 1703725.
6. T. Hu, Z. Feng, Y. Zhang, Y. Liu, J. Sun, J. Zheng, H. Jiang, P. Wang, X. Dong and C. Meng, “Double Guarantee Mechanism” of Ca<sup>2+</sup>-intercalation and rGO-integration Ensures Hydrated Vanadium Oxide with a High Performance for Aqueous Zinc-ion Batteries, *Inorg. Chem. Front.*, 2021, **8**, 79-89.
7. Y. Zhang, L. Xu, H. Jiang, Y. Liu and C. Meng, Polyaniline-expanded the interlayer spacing of hydrated vanadium pentoxide by the interface-intercalation for aqueous rechargeable Zn-ion batteries, *J. Colloid Interface Sci.*, 2021, **603**, 641-650.
8. R. Li, F. Xing, T. Li, H. Zhang, J. Yan, Q. Zheng and X. Li, Intercalated polyaniline in V<sub>2</sub>O<sub>5</sub> as a unique vanadium oxide bronze cathode for highly stable aqueous zinc ion battery, *Energy Storage Mater.*, 2021, **38**, 590-598.
9. M. Wang, J. Zhang, L. Zhang, J. Li, W. Wang, Z. Yang, L. Zhang, Y. Wang, J. Chen, Y. Huang, D. Mitlin and X. Li, Graphene-like Vanadium Oxygen Hydrate (VOH) Nanosheets Intercalated and Exfoliated by Polyaniline (PANI) for Aqueous Zinc-Ion Batteries (ZIBs), *ACS Appl. Mater. Interfaces*, 2020, **12**, 31564-31574.
10. Y. Liu, Z. Pan, D. Tian, T. Hu, H. Jiang, J. Yang, J. Sun, J. Zheng, C. Meng and Y. Zhang, Employing “one for two” strategy to design polyaniline-intercalated hydrated vanadium oxide with expanded interlayer spacing for high-performance aqueous zinc-ion batteries, *Chem. Eng. J.*, 2020, **399**, 125842.
11. S. Chen, K. Li, K. S. Hui and J. Zhang, Regulation of Lamellar Structure of Vanadium Oxide via

Polyaniline Intercalation for High-Performance Aqueous Zinc-Ion Battery, *Adv. Funct. Mater.*, 2020, **30**, 2003890.

12. F. S. Volkov, E. G. Tolstopjatova, S. N. Eliseeva, M. A. Kamenskii, A. I. Vypritskaia, A. I. Volkov and V. V. Kondratiev, Vanadium(V) oxide coated by poly(3,4-ethylenedioxythiophene) as cathode for aqueous zinc-ion batteries with improved electrochemical performance, *Mater. Lett.*, 2022, **308**, 131210.

13. J. Sun, Y. Zhao, Y. Liu, H. Jiang, C. Huang, M. Cui, T. Hu, C. Meng and Y. Zhang, "Three-in-One" Strategy that Ensures  $V_2O_5 \cdot nH_2O$  with Superior  $Zn^{2+}$  Storage by Simultaneous Protonated Polyaniline Intercalation and Encapsulation, *Small Struct.*, 2022, **3**, 2100212.

14. S. Li, X. Wei, C. Wu, B. Zhang, S. Wu and Z. Lin, Constructing Three-Dimensional Structured  $V_2O_5$ /Conductive Polymer Composite with Fast Ion/Electron Transfer Kinetics for Aqueous Zinc-Ion Battery, *ACS Appl. Energ. Mater.*, 2021, **4**, 4208-4216.

15. Y. Du, X. Wang and J. Sun, Tunable oxygen vacancy concentration in vanadium oxide as mass-produced cathode for aqueous zinc-ion batteries, *Nano Res.*, 2021, **14**, 754-761.

16. Z. Yao, Q. Wu, K. Chen, J. Liu and C. Li, Shallow-layer pillaring of a conductive polymer in monolithic grains to drive superior zinc storage via a cascading effect, *Energ. Environ. Sci.*, 2020, **13**, 3149-3163.

17. D. Bin, W. Huo, Y. Yuan, J. Huang, Y. Liu, Y. Zhang, F. Dong, Y. Wang and Y. Xia, Organic-Inorganic-Induced Polymer Intercalation into Layered Composites for Aqueous Zinc-Ion Battery, *Chem*, 2020, **6**, 968-984.

18. D. Xu, H. Wang, F. Li, Z. Guan, R. Wang, B. He, Y. Gong and X. Hu, Conformal Conducting Polymer Shells on  $V_2O_5$  Nanosheet Arrays as a High-Rate and Stable Zinc-Ion Battery Cathode, *Adv. Mater. Interfaces*, 2019, **6**, 1801506.
